# Supplementary material for: Architecture engineering toward highly active palladium integrated titanium dioxide yolk–double-shell nanoreactor for catalytic applications
Source: Royal Society of Chemistry journal article supplement (doi:10.1039/c4nr02692f), 2014-08-05
Supplement: c4nr02692f1.pdf [file c4nr02692f1.pdf]

## Supporting Information

### **Architecture Engineering Toward Highly Active Palladium Integrated Titanium Dioxide Yolk-Double-Shell Nanoreactor for Catalytic Applications**

Baocang Liu,<sup>a,b</sup> Qin Wang,<sup>a,c</sup> Shengli Yu,<sup>a</sup> Peng Jing,<sup>a</sup> Lixia Liu,<sup>a</sup> Gangran Xu,<sup>a</sup> and Jun Zhang<sup>\*a,b,c</sup>

<sup>a</sup> College of Chemistry and Chemical Engineering, Inner Mongolia University, Hohhot 010021, P. R. China

<sup>b</sup> College of Life Science, Inner Mongolia University, Hohhot 010021, P. R. China

<sup>c</sup> Inner Mongolia Key Lab of Nanoscience and Nanotechnology, Hohhot 010021, P. R. China

Corresponding Author: J. Zhang, [cejzhang@imu.edu.cn](mailto:cejzhang@imu.edu.cn)

## Experimental

### 1. Synthesis of SiO<sub>2</sub>/Pd (SOL-IMP) and SiO<sub>2</sub>@TiO<sub>2</sub>/Pd (SOL-IMP) catalysts.

Typically, PdCl<sub>2</sub> solution (1 g/L, 4 mL) and PVA solution (1 wt%, 0.31 mL) were diluted to 100 mL with deionized water under vigorous stirring. After 30 min, NaBH<sub>4</sub> solution (0.1 mol/L, 1.1 mL) was injected into the above solution, and a dark-brown solution was obtained, which indicated that the Pd colloids were formed. After another 30 min, 0.2 g of amino modified SiO<sub>2</sub> or SiO<sub>2</sub>@TiO<sub>2</sub> sphere was added immediately. After stirring for 4 h, the Pd colloids were completely absorbed, as indicated by the discoloration of the solution. The SiO<sub>2</sub>/Pd(SOL-IMP) and SiO<sub>2</sub>@TiO<sub>2</sub>/Pd(SOL-IMP) were collected by centrifugation, and washed three times with deionized water. Finally, SiO<sub>2</sub>/Pd(SOL-IMP) and SiO<sub>2</sub>@TiO<sub>2</sub>/Pd(SOL-IMP) were calcinated at 600 °C for 3h, and reduced in a hydrogen atmosphere at 300°C for 2 h. Thus, the finally SiO<sub>2</sub>/Pd(SOL-IMP) and SiO<sub>2</sub>@TiO<sub>2</sub>/Pd(SOL-IMP) catalysts were obtained.

### 2. Synthesis of SiO<sub>2</sub>/Pd (ION-IMP) and SiO<sub>2</sub>@TiO<sub>2</sub>/Pd (ION-IMP) catalysts.

In a typical synthesis, amino modified SiO<sub>2</sub> or SiO<sub>2</sub>@TiO<sub>2</sub> sphere (0.2 g) was added into 4 mL of PdCl<sub>2</sub> solution (1 g/L), and the mixture solution was diluted to 100 mL with deionized water. After stirring 12 h, the products were collected by centrifugation, washed five times with deionized water. Then, the obtained SiO<sub>2</sub>/Pd<sup>2+</sup> and SiO<sub>2</sub>@TiO<sub>2</sub>/Pd<sup>2+</sup> were calcinated at 600 °C for 3h, following reduction under H<sub>2</sub> atmosphere at 300°C for 2 h to achieve the finally SiO<sub>2</sub>/Pd(ION-IMP) and SiO<sub>2</sub>@TiO<sub>2</sub>/Pd(ION-IMP) catalysts.

### 3. Synthesis of Pd@SiO<sub>2</sub> catalyst.

First, 4 mL of Pd Sol (1g/L) was added into a beaker charged with absolute ethanol (66 mL), and ammonia solution (3.4 mL) under stirring for 30 min. Afterward, TEOS (0.4 mL) was added, and the reaction was carried out at room temperature for 24 h under continuous magnetic stirring. The Pd@SiO<sub>2</sub> spheres were obtained by centrifugation and washed three times with deionized water and absolute ethanol. Then, the obtained Pd@SiO<sub>2</sub> were calcinated at 600 °C for 3h, following reduction under H<sub>2</sub> atmosphere at 300°C for 2 h to achieve the finally Pd@SiO<sub>2</sub> catalysts.

## Discussion

### The possible mechanism of yolk-double-shell Pd@TiO<sub>2</sub>/Pd@TiO<sub>2</sub> for improved catalytic performance

As illustrated in Scheme S3, the higher catalytic activity of the yolk-double-shell Pd@TiO<sub>2</sub>/Pd@TiO<sub>2</sub> catalyst may have several causes. First, the yolk-double-shell configuration has two independent compartments (the interlayer chamber between the double TiO<sub>2</sub> shells and central cavity), which can be used as a nanoreactor. Because of the confinement effect in the microenvironments, it may be more effective than other traditional single-shell hollow nanoreactors for enriching reactants. The high concentration of reactants in the nanoreactor may accelerate the catalytic reaction,<sup>[1]</sup> leading to higher catalytic activity. Second, PNPs are highly dispersed onto both the external and internal surfaces of the inner TiO<sub>2</sub> shell, enhancing the synergistic effect between PNPs and TiO<sub>2</sub> shells. This can be proven

by the fact that the double-shell @TiO<sub>2</sub>@Pd@TiO<sub>2</sub> catalyst with PNPs encapsulated in the interlayer space has low catalytic activity for bromobenzene, and the conversion rate is only 8.9% after 60 min. This may be due to the lower interaction of PNPs with TiO<sub>2</sub> shells, leading to a weak synergistic effect and low catalytic activity. In addition, as PNPs are well dispersed on both surfaces of the inner TiO<sub>2</sub> shell, increasing PNPs active sites in contact with the reactants, which improves the catalytic performance.<sup>[2]</sup> Third, because the inner TiO<sub>2</sub> shell is composed of TiO<sub>2</sub> nanocrystals with less crystallization, a large number of –OH groups rooted from the hydrolysis of tetrabutyl orthotitanate (TBOT) exist on the surface of the TiO<sub>2</sub> shell. It is well known that the oxidative addition (Step I in Scheme S3) is the rate-determining step during the Suzuki-Miyaura coupling reaction. The synergistic effect between the PNPs and –OH groups on the surface inner TiO<sub>2</sub> shell will speed up the reaction by increasing the reaction rate of step I.<sup>[3]</sup> The products are finally generated after transmetalation (Step II and III) and reductive elimination (Step IV). Fourth, the rational design of the yolk-double-shell Pd@TiO<sub>2</sub>/Pd@TiO<sub>2</sub> architecture may improve catalytic activity, since the inner TiO<sub>2</sub> shell can prevent PNPs from growing larger during preparation, and the outer TiO<sub>2</sub> shell prevents the deletion of PNPs and creates an interlayer chamber connecting with the central cavity to form nanoreactors. Such design may favor improved catalytic efficiency. Finally, the mesoporous TiO<sub>2</sub> shells favor the easy diffusion of reactants and products, which is beneficial for heterogeneous catalysis.

**Table S1.** Comparison of catalytic performance of the obtained double-shell @TiO<sub>2</sub>/Pd@TiO<sub>2</sub> (ION-IMP) catalysts with the previously reported Pd-based catalysts in recent years for Suzuki–Miyaura coupling reactions of iodobenzene and phenylboronic acid.

| Catalyst                                                                | Temp. [°C] | Pd [mol] | D <sub>Pd</sub> [nm] | Solvent               | Time [h] | Conversion [%] | Ref.      |
|-------------------------------------------------------------------------|------------|----------|----------------------|-----------------------|----------|----------------|-----------|
| @Pd/TiO <sub>2</sub> /Pd@TiO <sub>2</sub>                               | 80         | 0.054    | 4, 20                | EtOH                  | 0.16     | 99             | This work |
| Pd/Nf-G                                                                 | 80         | 0.3      | 6                    | EtOH/H <sub>2</sub> O | 1        | 94             | [4]       |
| Pd/polymer                                                              | 100        | 0.5      | 50                   | DMF/H <sub>2</sub> O  | 12       | 100            | [5]       |
| Fe <sub>3</sub> O <sub>4</sub> @SiO <sub>2</sub> @mSiO <sub>2</sub> -Pd | 80         | 0.075    | 4-10                 | Isopropanol           | 6        | 98             | [6]       |
| Pd/SBA-16                                                               | 80         | 0.5      | —                    | EtOH                  | 2        | 99             | [7]       |
| HMMS–NH <sub>2</sub> –Pd                                                | 70         | 0.6      | 9                    | EtOH                  | 0.5      | 99             | [8]       |
| MWNT/Pd                                                                 | 70         | 2        | 1.1                  | MeOH                  | 4        | 100            | [9]       |
| Pd/Fe <sub>3</sub> O <sub>4</sub>                                       | 86         | 0.2      | 5                    | EtOH/H <sub>2</sub> O | 0.5      | 97             | [10]      |
| Pd/Fe <sub>3</sub> O <sub>4</sub> @C                                    | 60         | 1        | 10                   | EtOH/H <sub>2</sub> O | 2        | 99             | [11]      |
| Pd/MFC                                                                  | 78         | 0.308    | 15                   | EtOH                  | 1        | 100            | [12]      |
| Pd/MIL-53(Al)-NH <sub>2</sub>                                           | 40         | 0.5      | 3.1                  | EtOH/H <sub>2</sub> O | 0.5      | 94             | [13]      |
| LDH-Pd(0)                                                               | 80         | 0.3      | 3.5                  | Dioxane/Water         | 10       | 96             | [14]      |
| Pd/modified silica Gel                                                  | 110        | 1        | 5                    | DMF                   | 4        | 94             | [15]      |
| Pd@peptide                                                              | 25         | 1.5      | 12-14                | H <sub>2</sub> O      | 4        | 99             | [16]      |
| Pd/NF300                                                                | 80         | 0.08     | 3-5                  | H <sub>2</sub> O      | 4        | 97             | [17]      |
| IL-PdNPs                                                                | 100        | 1        | 6                    | H <sub>2</sub> O      | 1        | 98             | [18]      |
| Pd-Fe <sub>3</sub> O <sub>4</sub>                                       | reflux     | 1        | 9                    | DME/H <sub>2</sub> O  | 24       | 99             | [19]      |
| Pd-graphene                                                             | 100        | 1.1      | 4                    | H <sub>2</sub> O      | 0.12     | 100            | [20]      |
| Pd/MCPCC                                                                | 80         | 0.1      | 18-30                | DMF                   | 0.67     | 96             | [21]      |
| Fe@Fe <sub>x</sub> O <sub>y</sub> /Pd                                   | 25         | 0.5      | 3-45                 | EtOH/H <sub>2</sub> O | 2        | 98             | [22]      |
| Pd/CD                                                                   | 60         | 0.01     | —                    | H <sub>2</sub> O      | 24       | 100            | [23]      |
| Pd(0)-MCM-41                                                            | 80         | 0.5      | 2-7                  | EtOH/H <sub>2</sub> O | 20       | 100            | [24]      |
| PS-co-PVP-Pd                                                            | 90         | 0.25     | 3.9                  | NEt <sub>3</sub>      | 3        | 99             | [25]      |
| Pd nanocrystals                                                         | 85         | 1.6      | 300                  | EtOH/H <sub>2</sub> O | 4        | 92             | [26]      |
| Pd/CNTPs                                                                | reflux     | 0.13     | 2-5                  | EtOH                  | 0.5      | 99             | [27]      |
| NanoPd-MWNTs                                                            | 110        | 0.25     | 2-4                  | DMF                   | 2        | 100            | [28]      |

**Table S2.** Suzuki–Miyaura coupling reactions of aryl halides on double-shell @TiO<sub>2</sub>/Pd@TiO<sub>2</sub> (SOL-IMP) catalysts<sup>a</sup>

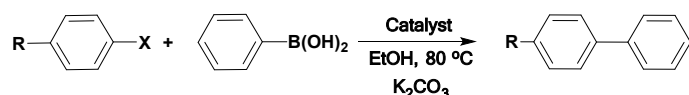

| Entry | X | R                  | Pd [mol%] | Reaction Time [min] | Conversion [%] | TOF [(h <sup>-1</sup> )] |
|-------|---|--------------------|-----------|---------------------|----------------|--------------------------|
| 1     | I | H                  | 0.056     | 20                  | 99.5           | 5330                     |
| 2     | I | -NO <sub>3</sub>   | 0.056     | 20                  | 99.5           | 5330                     |
| 3     | I | -OH                | 0.056     | 20                  | 92.7           | 4966                     |
| 4     | I | -COOH              | 0.056     | 20                  | 93.4           | 5003                     |
| 5     | I | -F                 | 0.056     | 20                  | 99.1           | 5309                     |
| 6     | I | -COCH <sub>3</sub> | 0.056     | 25                  | 93.6           | 4011                     |
| 7     | I | -CH <sub>3</sub>   | 0.056     | 25                  | 91.2           | 3908                     |
| 8     | I | -NH <sub>2</sub>   | 0.056     | 30                  | 78.1           | 2789                     |
| 9     | I | -OCH <sub>3</sub>  | 0.056     | 30                  | 74.3           | 2653                     |

**Table S3.** Actual Pd content loaded on different catalysts and their corresponding turnover frequencies (TOF) for 4-nitrophenol reduction reactions.

| Catalysts                                          | Actual content of Pd [wt%] | TOF (h <sup>-1</sup> ) <sup>a</sup> |
|----------------------------------------------------|----------------------------|-------------------------------------|
| Pd@TiO <sub>2</sub> /Pd@TiO <sub>2</sub> (ION-IMP) | 0.12                       | 801                                 |
| @TiO <sub>2</sub> /Pd@TiO <sub>2</sub> (SOL-IMP)   | 0.15                       | 236                                 |
| @TiO <sub>2</sub> @Pd@TiO <sub>2</sub> (SOL-IMP)   | 0.96                       | 24                                  |
| @TiO <sub>2</sub> /Pd (ION-IMP)                    | 0.76                       | 38                                  |
| @TiO <sub>2</sub> /Pd (SOL-IMP)                    | 0.88                       | 20                                  |

<sup>a</sup> TOF is defined as the moles of reduced 4-nitrophenol molecules per mole of Pd atom in catalyst per hour.

**Table S4.** Actual and theoretical hydrogen consumptions of the reduction peak in different catalysts.

| Catalysts                                             | Actually hydrogen consumption <sup>a</sup> [μmol·g <sup>-1</sup> <sub>Cat.</sub> ] | Theoretical hydrogen consumption [μmol·g <sup>-1</sup> <sub>Cat.</sub> ] |
|-------------------------------------------------------|------------------------------------------------------------------------------------|--------------------------------------------------------------------------|
| PdO@SiO <sub>2</sub>                                  | 9.61                                                                               | 9.25                                                                     |
| SiO <sub>2</sub> /PdO (ION-IMP)                       | 8.27                                                                               | 7.98                                                                     |
| SiO <sub>2</sub> @TiO <sub>2</sub> /PdO (ION-IMP),    | 15.5                                                                               | 6.56                                                                     |
| @PdO/TiO <sub>2</sub> /PdO@TiO <sub>2</sub> (ION-IMP) | 5.17                                                                               | 1.13                                                                     |

<sup>a</sup>The amount of H<sub>2</sub> uptake during the reduction was measured by a thermal conductivity detector (TCD), which was calibrated by the quantitative reduction of CuO to the metallic copper.

**Table S5.** Suzuki-Miyaura coupling reaction of halogeno benzene over different catalysts.<sup>a</sup>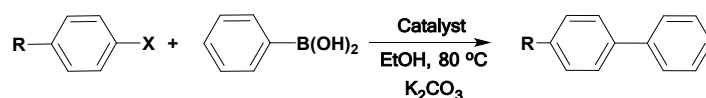

| Catalyst                                         | X  | R | Reaction [min] | Pd [mol%] | Conversion [%] | TOF [h <sup>-1</sup> ] | D <sub>Pd</sub> [nm] | Actual content of Pd [wt%] |
|--------------------------------------------------|----|---|----------------|-----------|----------------|------------------------|----------------------|----------------------------|
| SiO <sub>2</sub> /Pd (SOL-IMP)                   | I  | H | 20             | 0.35      | 97.3           | 836                    | 8-10                 | 0.91                       |
| SiO <sub>2</sub> /Pd (ION-IMP)                   | I  | H | 20             | 0.32      | 97.6           | 917                    | 10-12                | 0.85                       |
| SiO <sub>2</sub> @TiO <sub>2</sub> /Pd (SOL-IMP) | I  | H | 10             | 0.29      | 99.1           | 2055                   | 10-20                | 0.71                       |
| SiO <sub>2</sub> @TiO <sub>2</sub> /Pd (ION-IMP) | I  | H | 10             | 0.27      | 99.2           | 2209                   | 12-20                | 0.70                       |
| Pd@SiO <sub>2</sub>                              | I  | H | 20             | 0.37      | 99             | 805                    | 15                   | 0.98                       |
| Pd sol                                           | I  | H | 10             | 0.30      | 99.5           | 2053                   | 3-5                  | 100                        |
| SiO <sub>2</sub> /Pd (SOL-IMP)                   | Br | H | 60             | 0.35      | 9.5            | 27                     | 8-10                 | 0.91                       |
| SiO <sub>2</sub> /Pd (ION-IMP)                   | Br | H | 60             | 0.32      | 10.3           | 32                     | 10-12                | 0.85                       |
| SiO <sub>2</sub> @TiO <sub>2</sub> /Pd (SOL-IMP) | Br | H | 60             | 0.29      | 48.3           | 167                    | 10-20                | 0.71                       |
| SiO <sub>2</sub> @TiO <sub>2</sub> /Pd (ION-IMP) | Br | H | 60             | 0.27      | 48.8           | 181                    | 12-20                | 0.70                       |
| Pd@SiO <sub>2</sub>                              | Br | H | 60             | 0.37      | 11.2           | 30                     | 15                   | 0.98                       |
| Pd sol                                           | Br | H | 60             | 0.30      | 40             | 134                    | 3-5                  | 100                        |

<sup>a</sup>Reaction conditions: 80°C ethanol (10 mL), iodobenzene or bromobenzene (0.5 mmol), phenylboronic acid (1 mmol), K<sub>2</sub>CO<sub>3</sub> (1 mmol), and catalyst (20 mg).

<sup>b</sup>Determined by HPLC using pentamethylbenzene as internal standard.

<sup>c</sup>TOF is calculated by moles of product per molar Pd per hour.

**Table S6.** Actual Pd loading content on different catalysts and their corresponding turnover frequencies (TOF) for 4-nitrophenol reduction reaction.

| Catalysts                                          | Actual content of Pd [wt.%] | TOF (h <sup>-1</sup> ) <sup>a</sup> |
|----------------------------------------------------|-----------------------------|-------------------------------------|
| Pd@TiO <sub>2</sub> /Pd@TiO <sub>2</sub> (ION-IMP) | 0.12                        | 801                                 |
| @TiO <sub>2</sub> /Pd@TiO <sub>2</sub> (SOL-IMP)   | 0.15                        | 236                                 |
| @TiO <sub>2</sub> @Pd@TiO <sub>2</sub> (SOL-IMP)   | 0.96                        | 24                                  |
| @TiO <sub>2</sub> /Pd (ION-IMP)                    | 0.76                        | 38                                  |
| @TiO <sub>2</sub> /Pd (SOL-IMP)                    | 0.88                        | 20                                  |
| Pd@SiO <sub>2</sub>                                | 0.98                        | 27                                  |
| SiO <sub>2</sub> /Pd (SOL-IMP)                     | 0.91                        | 15                                  |
| SiO <sub>2</sub> /Pd (ION-IMP)                     | 0.85                        | 18                                  |
| SiO <sub>2</sub> @TiO <sub>2</sub> /Pd (SOL-IMP)   | 0.75                        | 30                                  |
| SiO <sub>2</sub> @TiO <sub>2</sub> /Pd (ION-IMP)   | 0.70                        | 25                                  |
| Pd sol                                             | -                           | 170                                 |

<sup>a</sup>TOF is defined as the moles of reduced 4-nitrophenol molecules per mole of Pd atom in catalyst per hour.

**Table S7.** Suzuki-Miyaura coupling reaction of bromobenzene over double-shell Pd@TiO<sub>2</sub>/Pd@TiO<sub>2</sub> catalysts with different sizes of Pd nanoparticles at 4, 6, and 11 nm.

| Catalyst                                 | X  | R | Reaction [min] | Pd [mol%] | D <sub>Pd</sub> [nm] | Conversion [%] | TOF [h <sup>-1</sup> ] | Actual content of Pd [wt%] |
|------------------------------------------|----|---|----------------|-----------|----------------------|----------------|------------------------|----------------------------|
| Pd@TiO <sub>2</sub> /Pd@TiO <sub>2</sub> | Br | H | 60             | 0.045     | 4                    | 72             | 1600                   | 0.12                       |
| Pd@TiO <sub>2</sub> /Pd@TiO <sub>2</sub> | Br | H | 60             | 0.034     | 6                    | 42             | 1244                   | 0.09                       |
| Pd@TiO <sub>2</sub> /Pd@TiO <sub>2</sub> | Br | H | 60             | 0.034     | 11                   | 24             | 711                    | 0.09                       |

<sup>a</sup>Reaction conditions: 80°C ethanol (10 mL), bromobenzene (0.5 mmol), phenylboronic acid (1 mmol), K<sub>2</sub>CO<sub>3</sub> (1 mmol), and catalyst (20 mg).

<sup>b</sup>Determined by HPLC using pentamethylbenzene as internal standard.

<sup>c</sup>TOF is calculated by moles of product per molar Pd per hour.

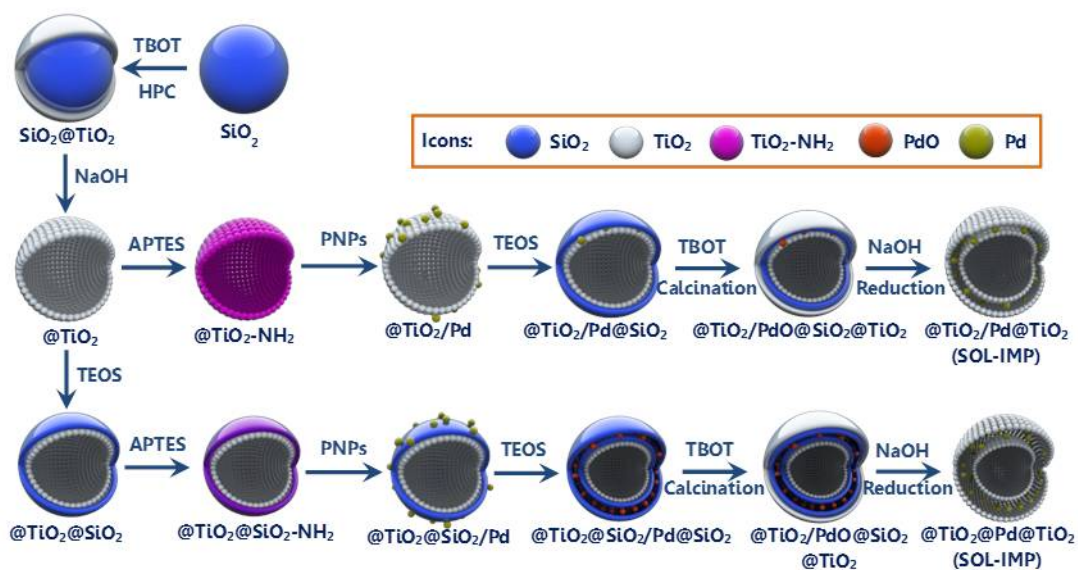

**Scheme S1.** Schematic diagram illustrating the synthesis of double-shell  $@\text{TiO}_2/\text{Pd}@\text{TiO}_2$  architecture with PNPs loaded on the external surface of the inner  $\text{TiO}_2$  shell and double-shell  $@\text{TiO}_2@/\text{Pd}@/\text{TiO}_2$  architecture with PNPs dispersed in the interlayer space of double  $\text{TiO}_2$  shells via a Pd sol impregnation process.

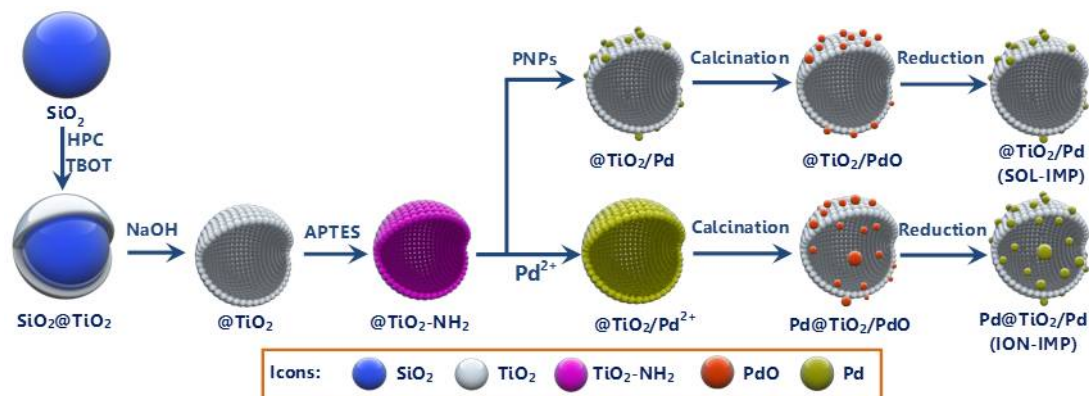

**Scheme S2.** Schematic diagram illustrating the synthesis of yolk-single-shell  $\text{Pd}@/\text{TiO}_2/\text{Pd}$  with yolk-type PNPs residing inside the central cavity and PNPs loaded on the external surface of the  $\text{TiO}_2$  shell via a  $\text{Pd}^{2+}$  ion-disffusion impregnation process and single-shell  $@\text{TiO}_2/\text{Pd}$  architectures with PNPs loaded on the external surface of the  $\text{TiO}_2$  shell via a Pd sol impregnation process.



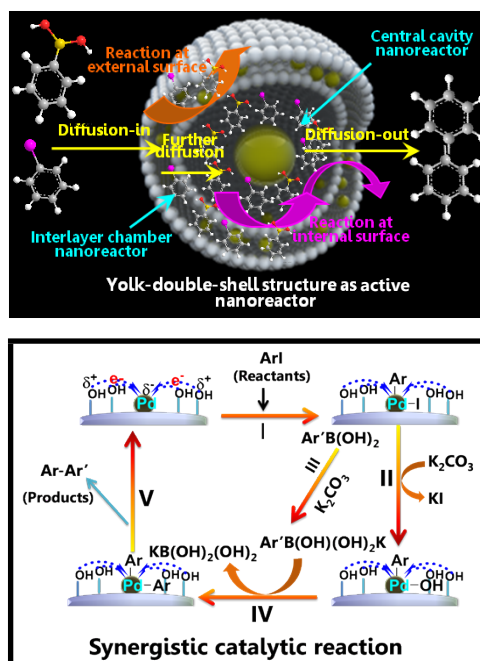

**Scheme S3.** Schematic illustration showing the improvement of synergistic catalytic effect (upper) and the catalytic process of Suzuki-Miyaura coupling reaction (lower) on a yolk-double-shell Pd@TiO<sub>2</sub>/Pd@TiO<sub>2</sub> nanoreactor.

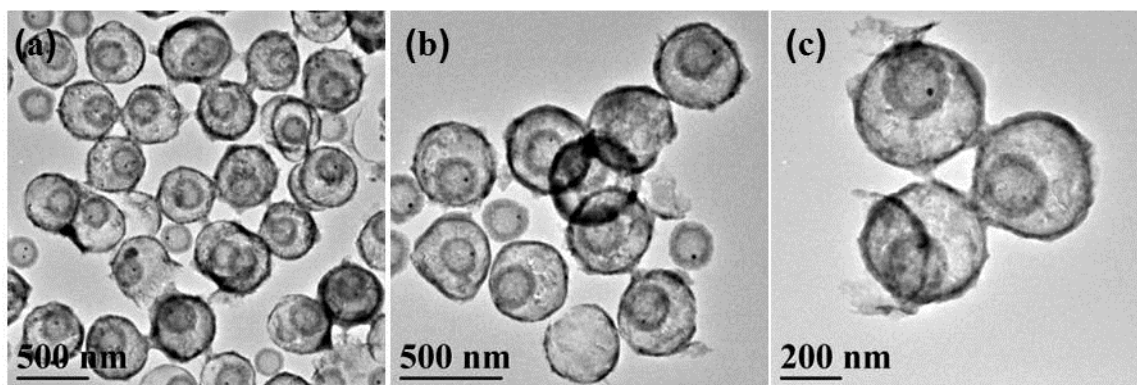

**Fig. S1.** (a-c) Low magnification TEM images showing yolk-double-shell Pd@TiO<sub>2</sub>/Pd@TiO<sub>2</sub> architectures with yolk-type PNPs residing in the double-shell TiO<sub>2</sub> cavity and ultrafine PNPs loading on both external and internal surfaces of the inner TiO<sub>2</sub> shell prepared via a Pd<sup>2+</sup> ion-diffusion impregnation method.

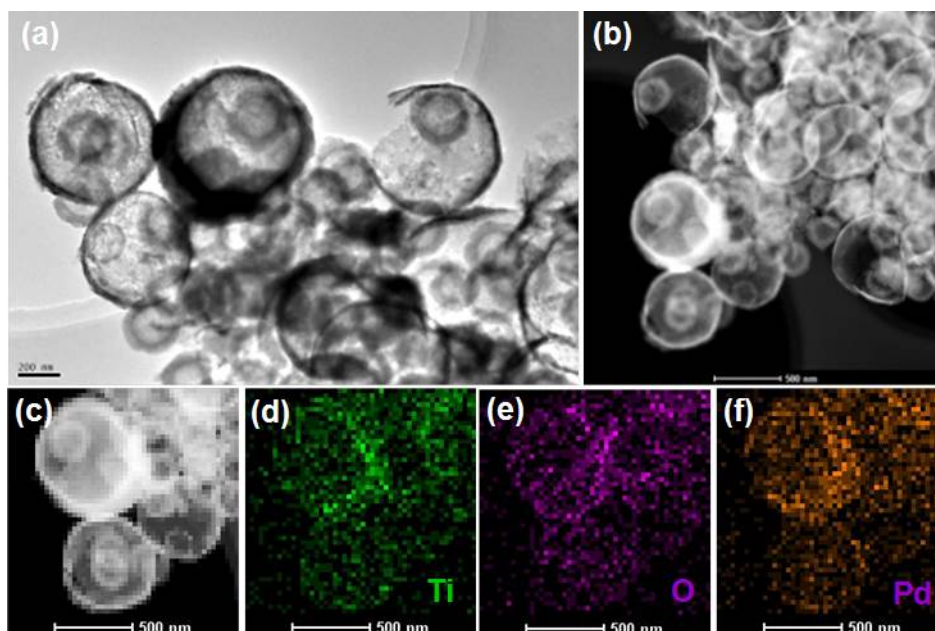

**Fig. S2** (a) TEM and (b and c) HADDF-STEM images of yolk-double-shell Pd@TiO<sub>2</sub>/Pd@TiO<sub>2</sub> architecture prepared by enlarging the dosage of all reactants five times, and (d-f) EDX elemental mapping of Ti, O, and Pd in yolk-double-shell Pd@TiO<sub>2</sub>/Pd@TiO<sub>2</sub> architecture.

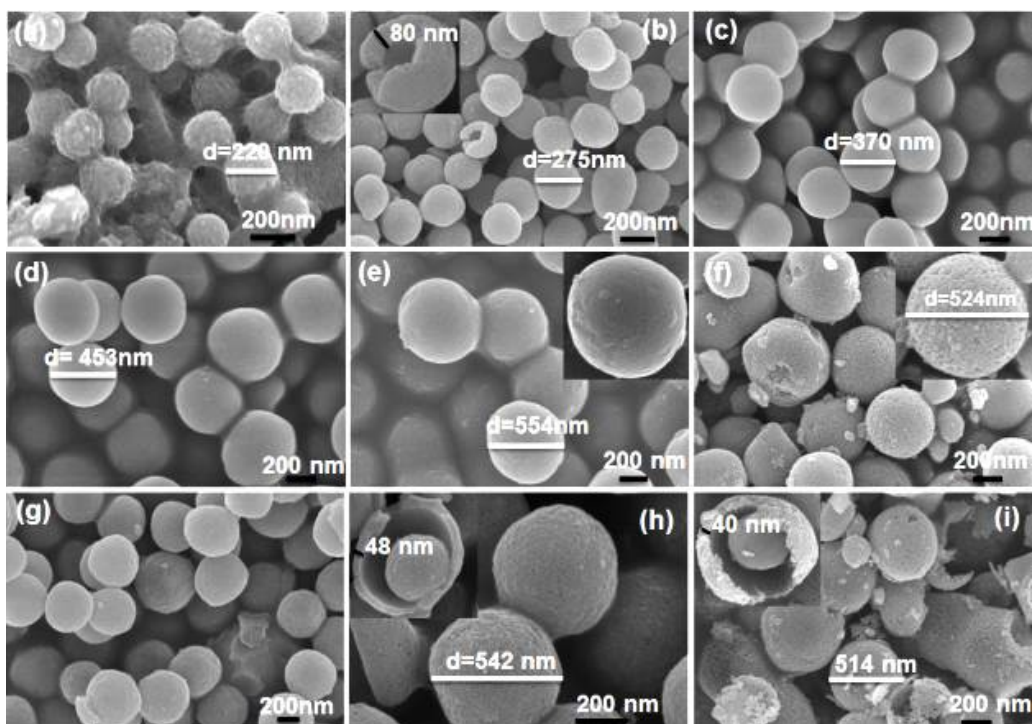

**Fig. S3.** The SEM images monitoring the formation of double-shell  $@\text{TiO}_2@\text{Pd}@\text{TiO}_2$  architecture with PNPs loaded in the interlayer space of the double  $\text{TiO}_2$  shells prepared via a Pd sol impregnation method. (a)  $\text{SiO}_2@\text{TiO}_2$ , (b)  $@\text{TiO}_2$ , (c)  $@\text{TiO}_2@\text{SiO}_2/\text{Pd}$ , (d)  $@\text{TiO}_2@\text{SiO}_2/\text{Pd}@\text{SiO}_2$ , (e)  $@\text{TiO}_2@\text{SiO}_2/\text{Pd}@\text{SiO}_2@\text{TiO}_2$  (before calcination), (f)  $@\text{TiO}_2@\text{SiO}_2/\text{Pd}@\text{SiO}_2@\text{TiO}_2$  (after calcination), (g) and (h)  $@\text{TiO}_2@\text{Pd}@\text{TiO}_2$  (before calcination), and (i)  $@\text{TiO}_2@\text{Pd}@\text{TiO}_2$  (after calcination). The insets in b, e, f, h, and i show the magnified FE-SEM images for a broken or an individual sphere.

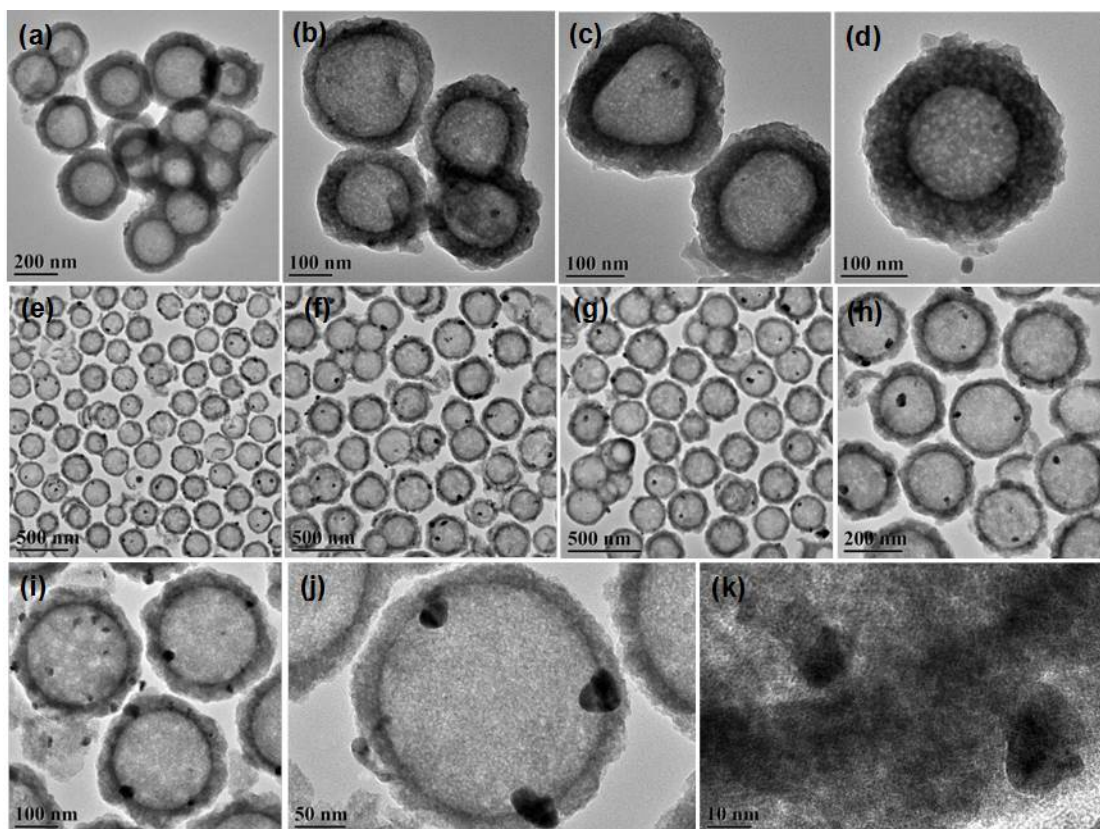

**Fig. S4.** TEM images illustrating the formation of (a-d) single-shell @TiO<sub>2</sub>/Pd architecture with PNPs loaded on the external surface of the inner TiO<sub>2</sub> shell prepared via a Pd sol impregnation method, and (e-k) yolk-single-shell Pd@TiO<sub>2</sub>/Pd architectures with yolk-type PNPs residing inside the central cavity and PNPs loaded on the external surface of the TiO<sub>2</sub> shell prepared via a Pd<sup>2+</sup> ion-diffusion method.



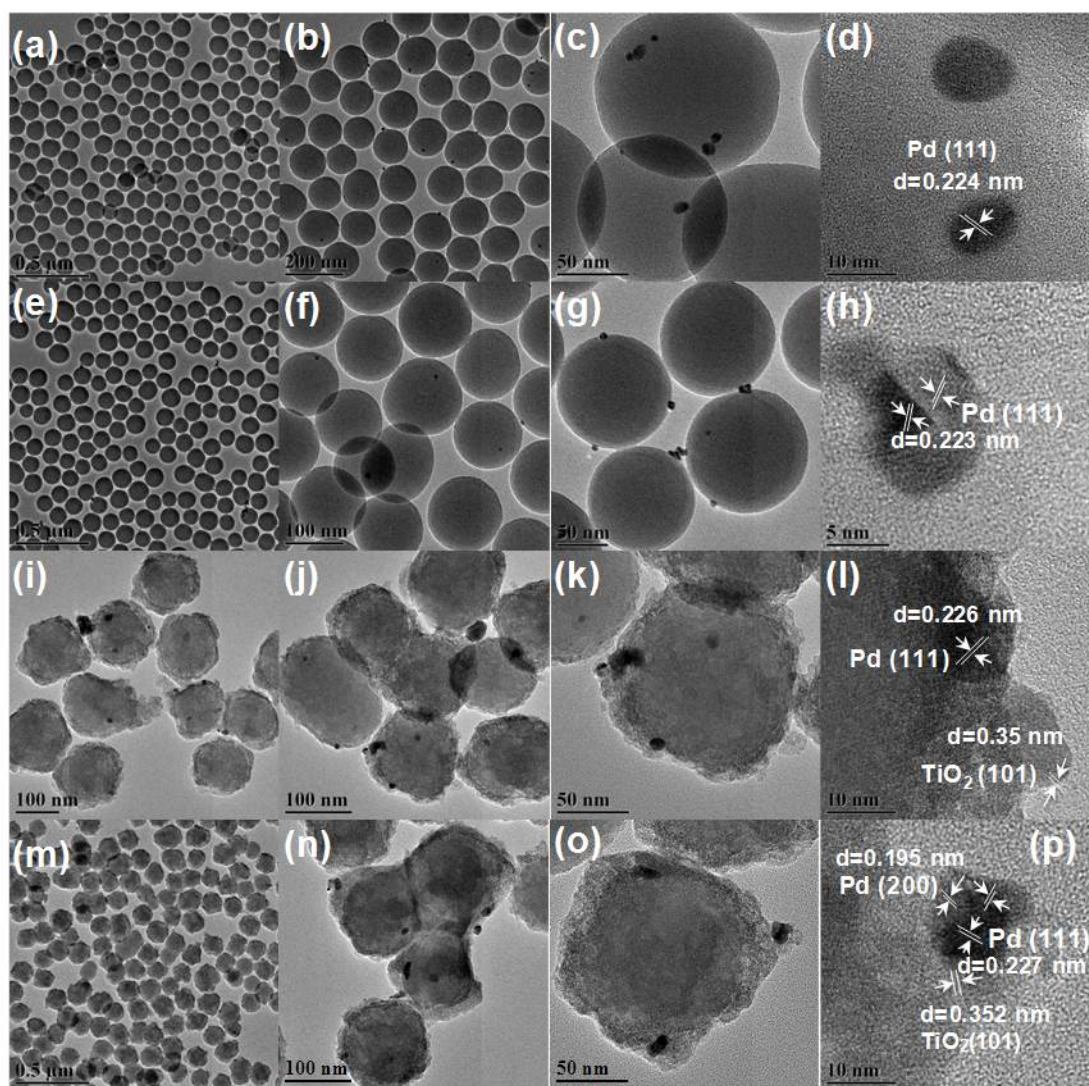

**Fig. S5.** TEM images of (a-d) SiO<sub>2</sub>/Pd (SOL-IMP), (e-h) SiO<sub>2</sub>/Pd (ION-IMP), (i-l) SiO<sub>2</sub>@TiO<sub>2</sub>/Pd (SOL-IMP), and (m-p) SiO<sub>2</sub>@TiO<sub>2</sub>/Pd (ION-IMP) catalysts.

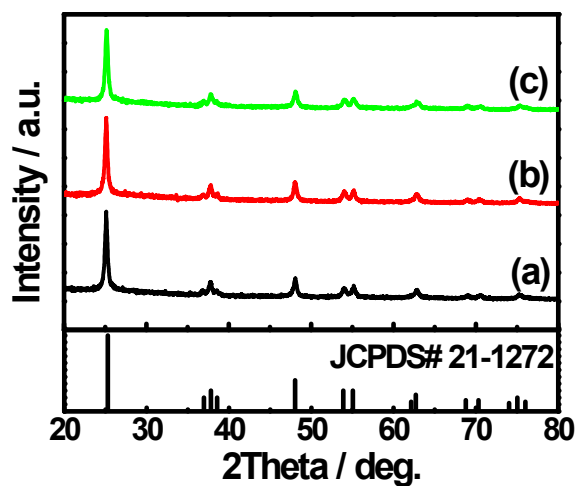

**Fig. S6.** XRD patterns of (a)  $\text{TiO}_2@\text{Pd}@\text{TiO}_2$ , (b)  $@\text{TiO}_2/\text{Pd}@\text{TiO}_2$ , and (c)  $\text{Pd}@\text{TiO}_2/\text{Pd}@\text{TiO}_2$  architectures after calcination.

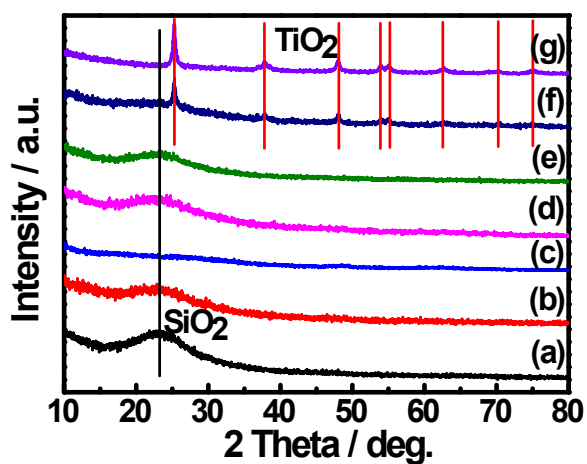

**Fig. S7.** XRD patterns monitoring the formation of double-shell  $@\text{TiO}_2@\text{Pd}@\text{TiO}_2$  architectures. (a)  $\text{SiO}_2$ , (b)  $\text{SiO}_2@\text{TiO}_2$ , (c)  $@\text{TiO}_2$ , (d)  $@\text{TiO}_2/\text{Pd}@\text{SiO}_2$  (e)  $@\text{TiO}_2@\text{SiO}_2/\text{Pd}@\text{SiO}_2@\text{TiO}_2$  (before calcination), (f)  $@\text{TiO}_2@\text{SiO}_2/\text{Pd}@\text{SiO}_2@\text{TiO}_2$  (after calcination), and (g)  $@\text{TiO}_2@\text{Pd}@\text{TiO}_2$  (after calcination).

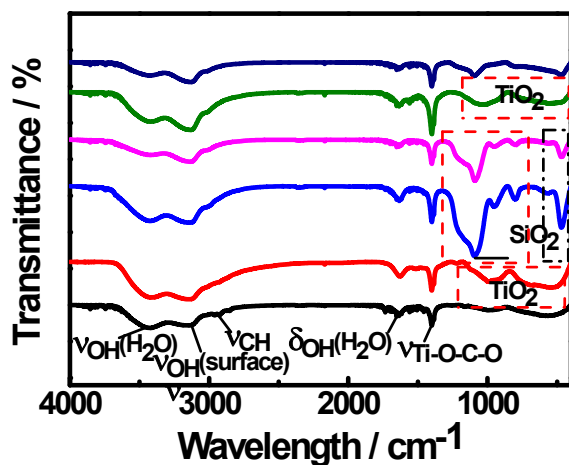

**Fig. S8.** FT-IR spectra monitoring the formation of yolk-double-shell Pd@TiO<sub>2</sub>/Pd@TiO<sub>2</sub> architectures (a) @TiO<sub>2</sub>, (b) @TiO<sub>2</sub>-NH<sub>2</sub>/Pd, (c) @TiO<sub>2</sub>/Pd@SiO<sub>2</sub>, (d) @TiO<sub>2</sub>/Pd@SiO<sub>2</sub>@TiO<sub>2</sub>, (e) Pd@TiO<sub>2</sub>/Pd@TiO<sub>2</sub> (before calcination), and (f) Pd@TiO<sub>2</sub>/Pd@TiO<sub>2</sub> (after calcination).

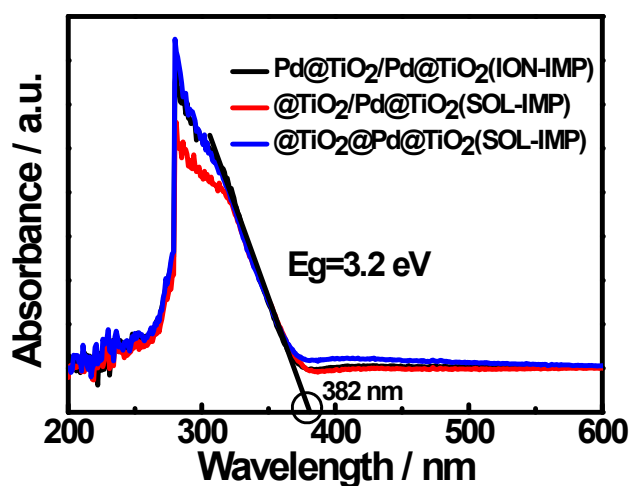

**Fig. S9.** UV-DRS spectra of Pd@TiO<sub>2</sub>/Pd@TiO<sub>2</sub>, @TiO<sub>2</sub>/Pd@TiO<sub>2</sub>, and TiO<sub>2</sub>@Pd@TiO<sub>2</sub> architectures after calcination.

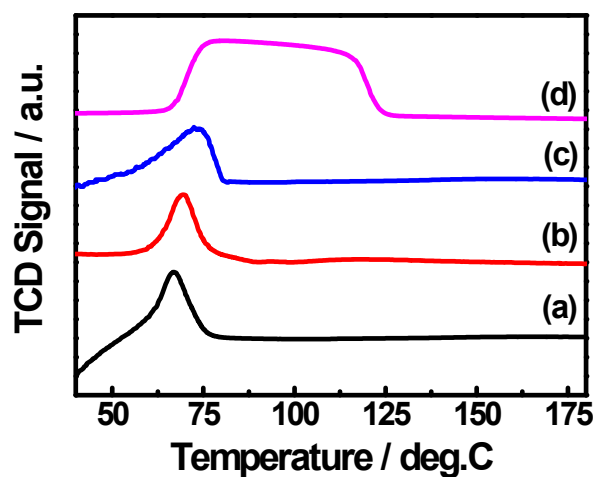

**Fig. S10.** TPR profiles of (a) yolk-double-shell PdO@TiO<sub>2</sub>/PdO@TiO<sub>2</sub>, (b) double-shell @TiO<sub>2</sub>/PdO@TiO<sub>2</sub>, (c) @TiO<sub>2</sub>@PdO@TiO<sub>2</sub> architectures after calcination, and (d) pure PdO.

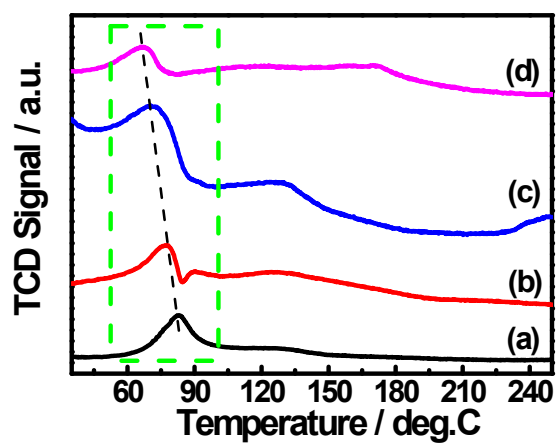

**Fig. S11.** H<sub>2</sub>-TPR profiles of (a) PdO@SiO<sub>2</sub>, (b) SiO<sub>2</sub>/PdO (ION-IMP), (c) SiO<sub>2</sub>@TiO<sub>2</sub>/PdO (ION-IMP), and (d) PdO@TiO<sub>2</sub>/PdO@TiO<sub>2</sub> (ION-IMP) catalysts.



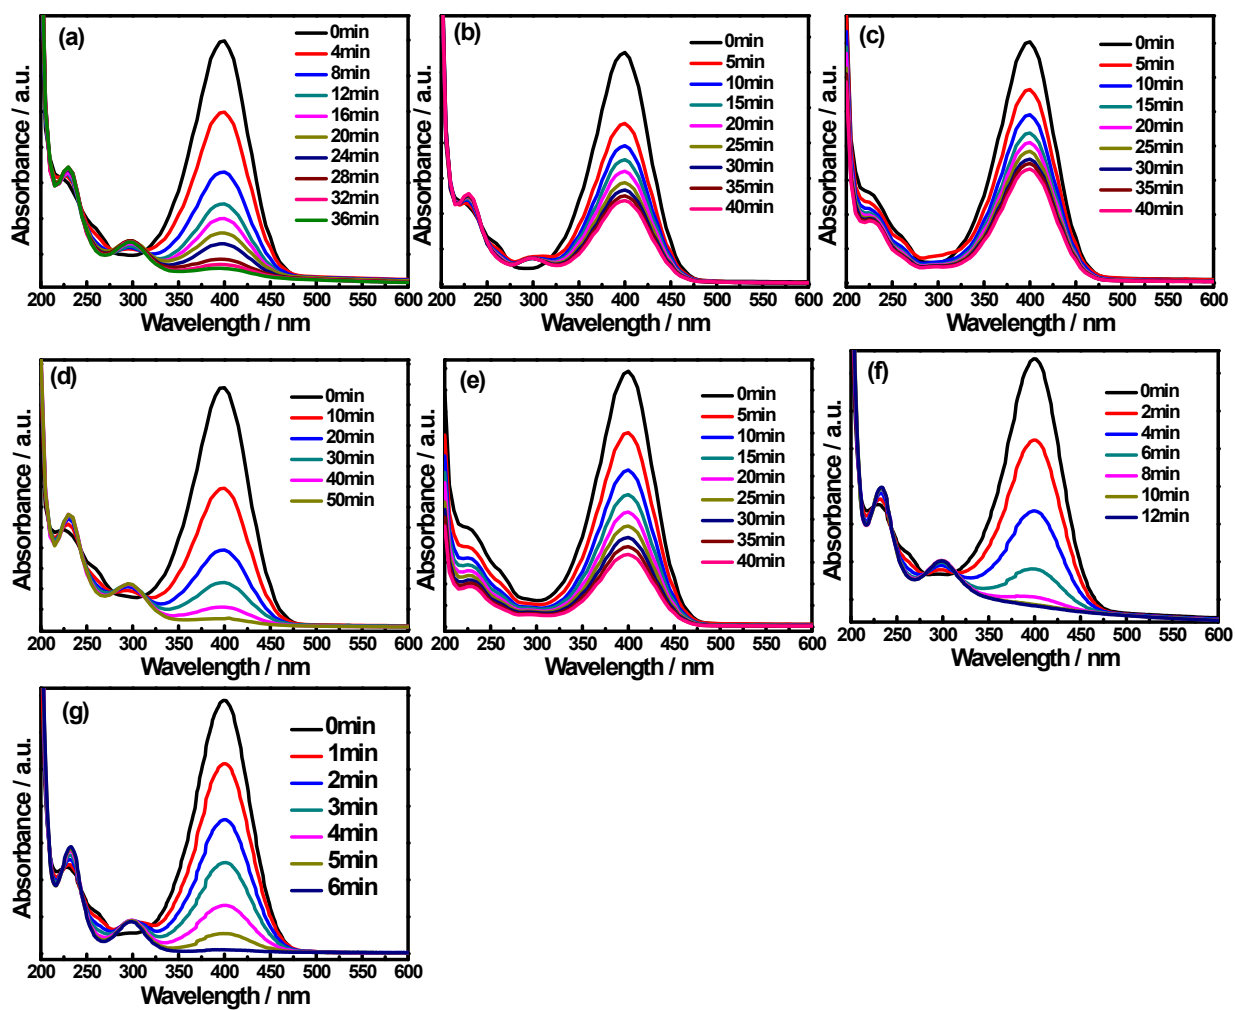

**Fig. S12.** UV-vis spectra indicating the reduction of 4-NP to 4-AP on (a)Pd@SiO<sub>2</sub>, (b) SiO<sub>2</sub> Pd/ (SOL-IMP), (c) SiO<sub>2</sub>/Pd (ION-IMP), (d) SiO<sub>2</sub>@TiO<sub>2</sub>/Pd (SOL-IMP), (e) SiO<sub>2</sub>@TiO<sub>2</sub>/Pd (ION-IMP), (f) Pd@TiO<sub>2</sub>/Pd@TiO<sub>2</sub> (ION-IMP), and (g) Pd sol catalysts.

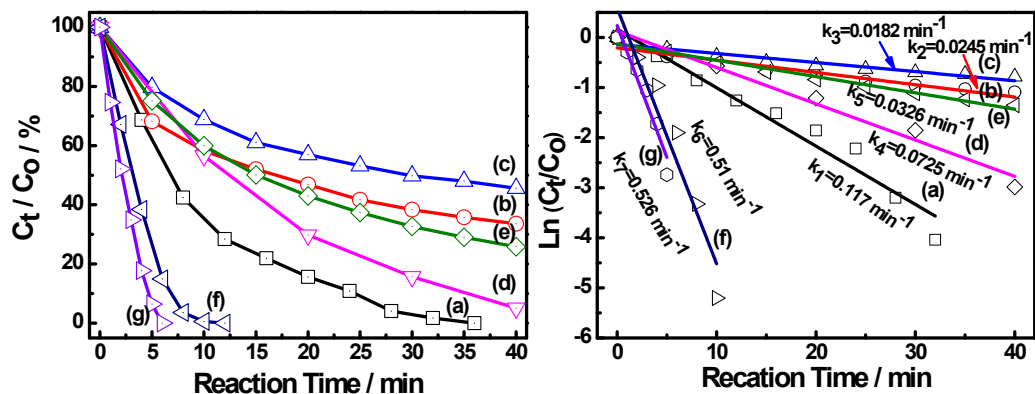

**Fig. S13.** (A) Catalytic tests of reduction rate for the reduction of 4-nitrophenol on (a) Pd@SiO<sub>2</sub>, (b) SiO<sub>2</sub>/Pd (SOL-IMP), (c) SiO<sub>2</sub>/Pd (ION-IMP), (d) SiO<sub>2</sub>@TiO<sub>2</sub>/Pd (SOL-IMP), (e) SiO<sub>2</sub>@TiO<sub>2</sub>/Pd (ION-IMP), (f) Pd@TiO<sub>2</sub>/Pd@TiO<sub>2</sub> (ION-IMP), and (g) Pd sol, (B) Plot of  $\ln(C_t/C_0)$  against the reaction time of on (a) Pd@SiO<sub>2</sub>, (b) SiO<sub>2</sub>/Pd (SOL-IMP), (c) SiO<sub>2</sub>/Pd (ION-IMP), (d) SiO<sub>2</sub>@TiO<sub>2</sub>/Pd (SOL-IMP), (e) SiO<sub>2</sub>@TiO<sub>2</sub>/Pd (ION-IMP), (f) Pd@TiO<sub>2</sub>/Pd@TiO<sub>2</sub> (ION-IMP), and (g) Pd sol catalysts

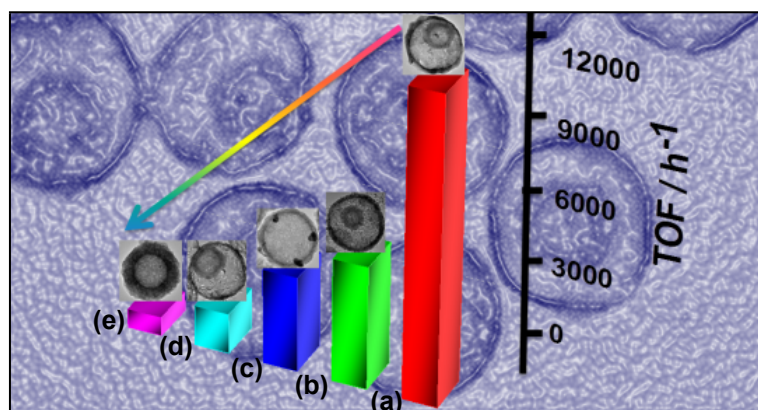

**Fig. S14.** The TOFs of (a) yolk-double-shell Pd@TiO<sub>2</sub>/Pd@TiO<sub>2</sub>, (b) double-shell @TiO<sub>2</sub>/Pd@TiO<sub>2</sub>, (c) yolk-single-shell Pd@TiO<sub>2</sub>/Pd, (d) single-shell @TiO<sub>2</sub>/Pd, and (e) double-shell @TiO<sub>2</sub>@Pd@TiO<sub>2</sub> architectures.

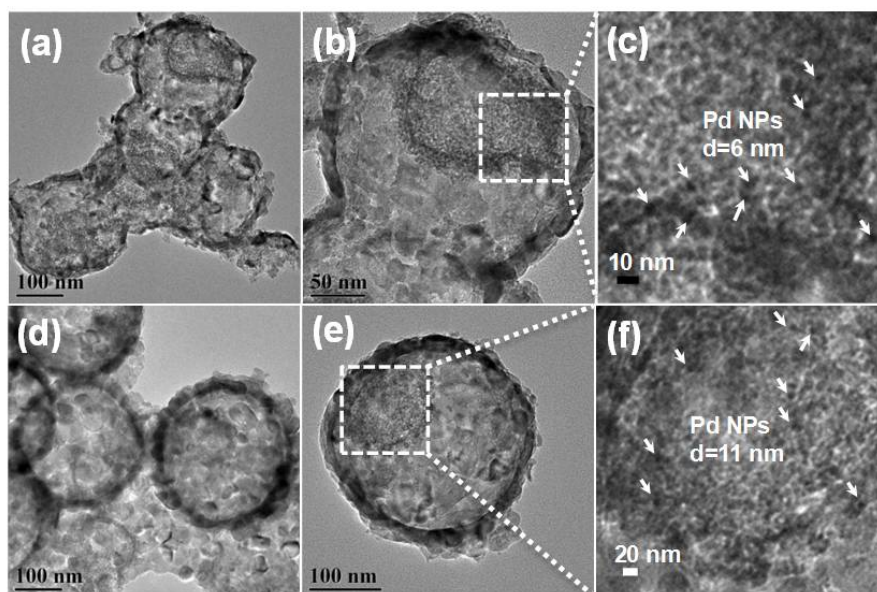

**Fig S15.** TEM images of double-shell Pd@TiO<sub>2</sub>/Pd@TiO<sub>2</sub> catalysts with different sizes of Pd nanoparticles at (a-c) 6 nm, (d-f) 11 nm.

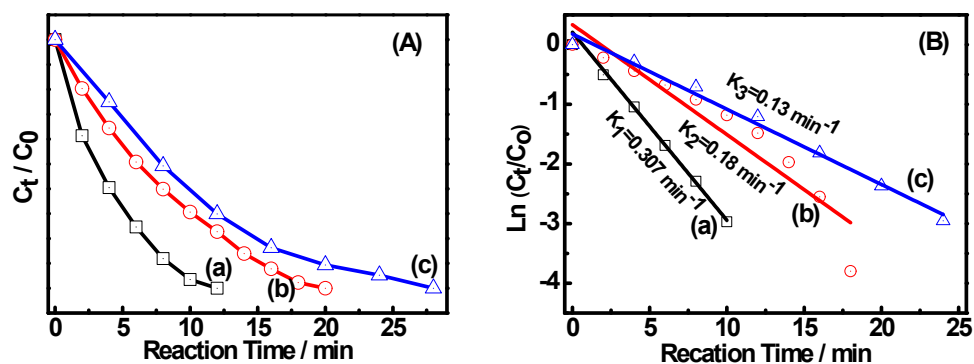

**Fig S16.** (A) Catalytic reduction rate of double-shell Pd@TiO<sub>2</sub>/Pd@TiO<sub>2</sub> catalysts with different sizes of Pd nanoparticles at (a) 4 nm, (b) 6 nm, and (c) for the reduction of 4-NP to 4-AP; (B) Plot of  $\ln(C_t/C_0)$  against the reaction time of double-shell Pd@TiO<sub>2</sub>/Pd@TiO<sub>2</sub> catalysts with different sizes of Pd nanoparticles at (a) 4 nm, (b) 6 nm, and (c) 11 nm.

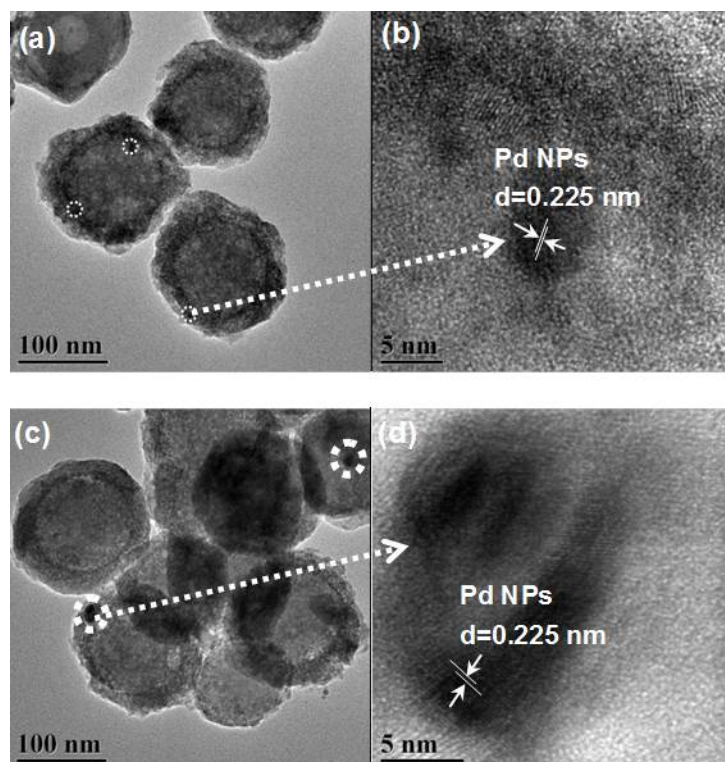

**Fig. S17.** (a and b) TEM images of SiO<sub>2</sub>@TiO<sub>2</sub>/Pd structure (fresh) and (c and d) SiO<sub>2</sub>@TiO<sub>2</sub>/Pd catalysts (after fourth cycle testing).

## References

- [1] [1] Y. Yang, X. Liu, X. B. Li, J. Zhao, S. Y. Bai, J. Liu and Q. H. Yang, *Angew. Chem. Int. Ed.*, 2012, **51**, 9164.
- [2] M. Cargnello, J. J. Delgado Jaen, J. C. Hernandez Garrido, K. Bakhmutsky, T. Montini, J. J. Calvino Gamez, R. J. Gorte and P. Fornasiero, *Science*, 2012, **337**, 713.
- [3] J. L. Shi, *Chem. Rev.*, 2013, 113, 2139.
- [4] S. S. Shendage, U. B. Patil, J. M. Nagarkar, *Tetrahed. Lett.*, **2013**, 54, 3457-3461.
- [5] K. Karami, M. Ghasemi, N. Haghghat Naeini, *Catal. Commun.*, **2013**, 38, 10-15.
- [6] W. Li, B. Zhang, X. Li, H. Zhang, Q. Zhang, *Appl. Catal. A- Gen.*, **2013**, 459, 65-72.
- [7] H.-b. Wang, Y.-h. Zhang, H.-l. Yang, Z.-y. Ma, F.-w. Zhang, J. Sun, J.-t. Ma, *Micropor. Mesopor. Mater.*, **2013**, 168, 65-72.
- [8] P. Wang, F. W. Zhang, Y. Long, M. Xie, R. Li, J. T. Ma, *Catal. Sci. Technol.*, **2013**, 3, 1618-1624.

- [9] B. Cornelio, G. A. Rance, M. Laronze-Cochard, A. Fontana, J. Sapi, A. N. Khlobystov, *J. Mater. Chem., A* **2013**, *1*, 8737-8744.
- [10] S. Li, W. Zhang, M.-H. So, C.-M. Che, R. Wang, R. Chen, *J. Mol. Catal. A: Chem.*, **2012**, *359*, 81-87.
- [11] R. Li, P. Zhang, Y. Huang, P. Zhang, H. Zhong, Q. Chen, *J. Mater. Chem.*, **2012**, *22*, 22750.
- [12] M. Zhu, G. Diao, *J. Phys. Chem. C*, **2011**, *115*, 24743-24749.
- [13] Y. Huang, Z. Zheng, T. Liu, J. Lü, Z. Lin, H. Li, R. Cao, *Catal. Commun.*, **2011**, *14*, 27-31.
- [14] S. Singha, M. Sahoo, K. M. Parida, *Dalton Trans.* **2011**, *40*, 7130-7132.
- [15] P. Dutta, A. Sarkar, *Adv. Synth. Catal.*, **2011**, *353*, 2814-2822.
- [16] M. A. Khalily, O. Ustahuseyin, R. Garifullin, R. Genc, M. O. Guler, *Chem. Commun.*, **2012**, *48*, 11358-11360.
- [17] Z. Gao, Y. Feng, F. Cui, Z. Hua, J. Zhou, Y. Zhu, J. Shi, *J. Mol. Catal. A: Chem.*, **2011**, *336*, 51-57.
- [18] K. M. Deshmukh, Z. S. Qureshi, K. D. Bhatte, K. A. Venkatesan, T. G. Srinivasan, P. R. V. Rao, B. M. Bhanage, *New J. Chem.*, **2011**, *35*, 2747-2751.
- [19] Y. Jang, J. Chung, S. Kim, S. W. Jun, B. H. Kim, D. W. Lee, B. M. Kim, T. Hyeon, *Phys. Chem. Chem. Phys.* **2011**, *13*, 2512-2516.
- [20] Y. Li, X. Fan, J. Qi, J. Ji, S. Wang, G. Zhang, F. Zhang, *Nano Res.*, **2010**, *3*, 429-437.
- [21] B. Tamami, S. Ghasemi, *J. Mol. Catal. A: Chem.*, **2010**, *322*, 98-105.
- [22] S. A. Zhou, M. Johnson, J. G. C. Veinot, *Chem. Commun.*, **2010**, *46*, 2411-2413.
- [23] J. D. Senra, L. F. B. Malta, M. E. H. M. da Costa, R. C. Michel, L. C. S. Aguiar, A. B. C. Simas, O. A. C. Antunes, *Adv. Synth. Catal.*, **2009**, *351*, 2411-2422.
- [24] S. Jana, S. Haldar, S. Koner, *Tetrahed. Lett.*, **2009**, *50*, 4820-4823.
- [25] F. Wen, W. Q. Zhang, G. W. Wei, Y. Wang, J. Z. Zhang, M. C. Zhang, L. Q. Shi, *Chem. Mater.*, **2008**, *20*, 2144-2150.
- [26] Y. H. Chen, H. H. Hung, M. H. Huang, *J. Am. Chem. Soc.*, **2009**, *131*, 9114-9121.
- [27] X. C. Chen, Y. Q. Hou, H. Wang, Y. Cao, J. H. He, *J. Phys. Chem. C*, **2008**, *112*, 8172-8176.

- [28] N. Karousis, G. E. Tsotsou, F. Evangelista, P. Rudolf, N. Ragoussis, N. Tagmatarchis, *J. Phys. Chem. C*, **2008**, *112*, 13463-13469.
